# Supplementary material for: Brønsted acidic ionic liquids of aza-crown ether complex cations: preparation and applications in organic reactions
Source: Royal Society of Chemistry journal article supplement (doi:10.1039/c4ra03061c), 2014-01-01

Electronic Supplementary Material (ESI) for RSC Advances

This journal is © The Royal Society of Chemistry 2014

# **Brønsted acidic ionic liquids of aza-crown ether complex cations: Preparation and applications in organic reactions**

Chen Cheng, Huanwang Jing\*

*State Key Laboratory of Applied Organic Chemistry, College of Chemistry and Chemical Engineering, Lanzhou University, Lanzhou, Gansu, 730000, China*

*E-mail address: hwjing@lzu.edu.cn (H Jing)*

Table of contents:

|                                 |     |
|---------------------------------|-----|
| NMR Spectra of New aCECILs..... | 2s  |
| IR Spectra of New aCECILs.....  | 7s  |
| TG-DTA.....                     | 9s  |
| MASS Spectra.....               | 12s |

Chemical structure of the potassium ionophore (18-crown-6 derivative) is shown in the top left. The structure features a crown ether ring with a sulfonate group ( $\text{SO}_3\text{H}$ ) and a potassium ion ( $\text{K}^+$ ) complexed within the ring. The bromide counterion ( $\text{Br}^-$ ) is also present.

The  $^1\text{H}$  NMR spectrum (DMSO- $d_6$ ) shows the following peaks and integrations:

| Chemical Shift (ppm)                                                                             | Integration |
|--------------------------------------------------------------------------------------------------|-------------|
| 3.951, 3.904, 3.851, 3.677, 3.571, 3.549, 3.525, 3.509, 3.450, 2.926                             | 4.05        |
| 2.159                                                                                            | 23.99       |
| 1.690, 1.387, 1.369, 1.345, 1.322, 0.957, 0.934, 0.911                                           | 1.93        |
| 22.78, 18.61, 17.24, 12.53                                                                       | 1.91        |
| 69.89, 69.38, 69.12, 69.11, 69.08, 68.69, 68.21, 63.38, 63.14, 59.64, 58.92, 58.07, 57.75, 46.84 | 2.00        |
| 2.16                                                                                             | 3.01        |

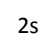

# NMR Spectra of aCECIL-2: D<sub>2</sub>O as solvent

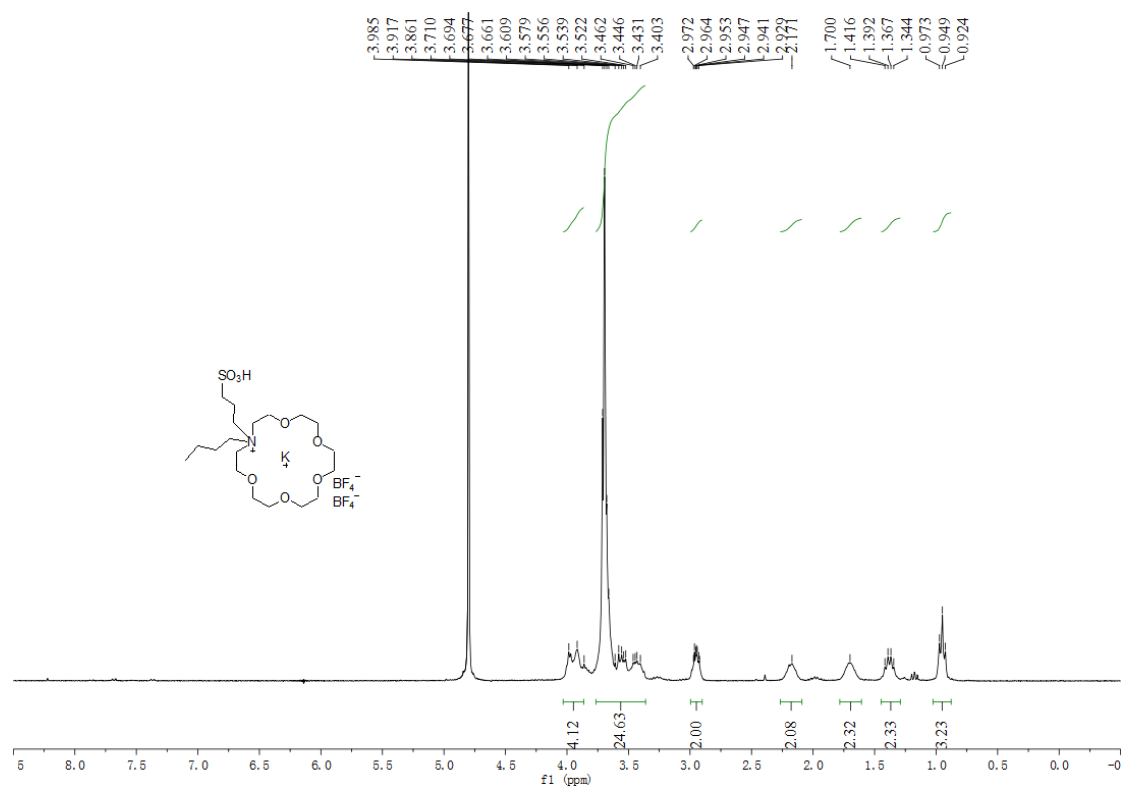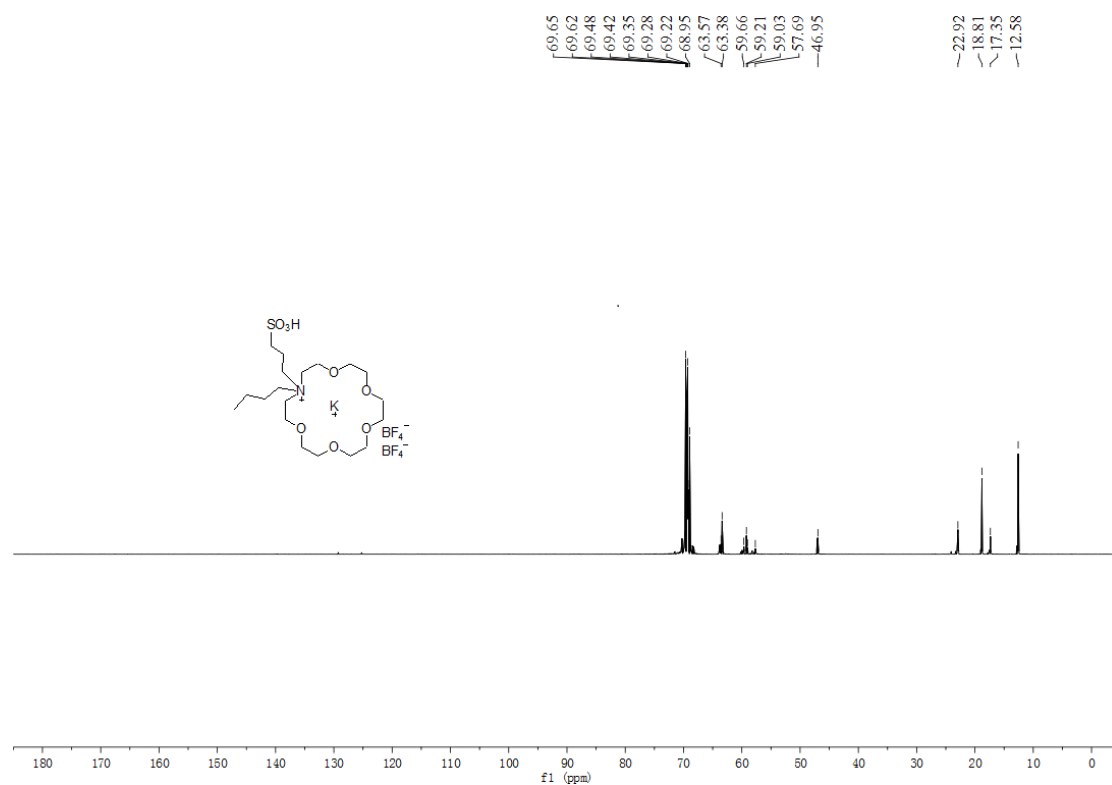

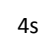

# NMR Spectra of aCECIL-4: D<sub>2</sub>O as solvent

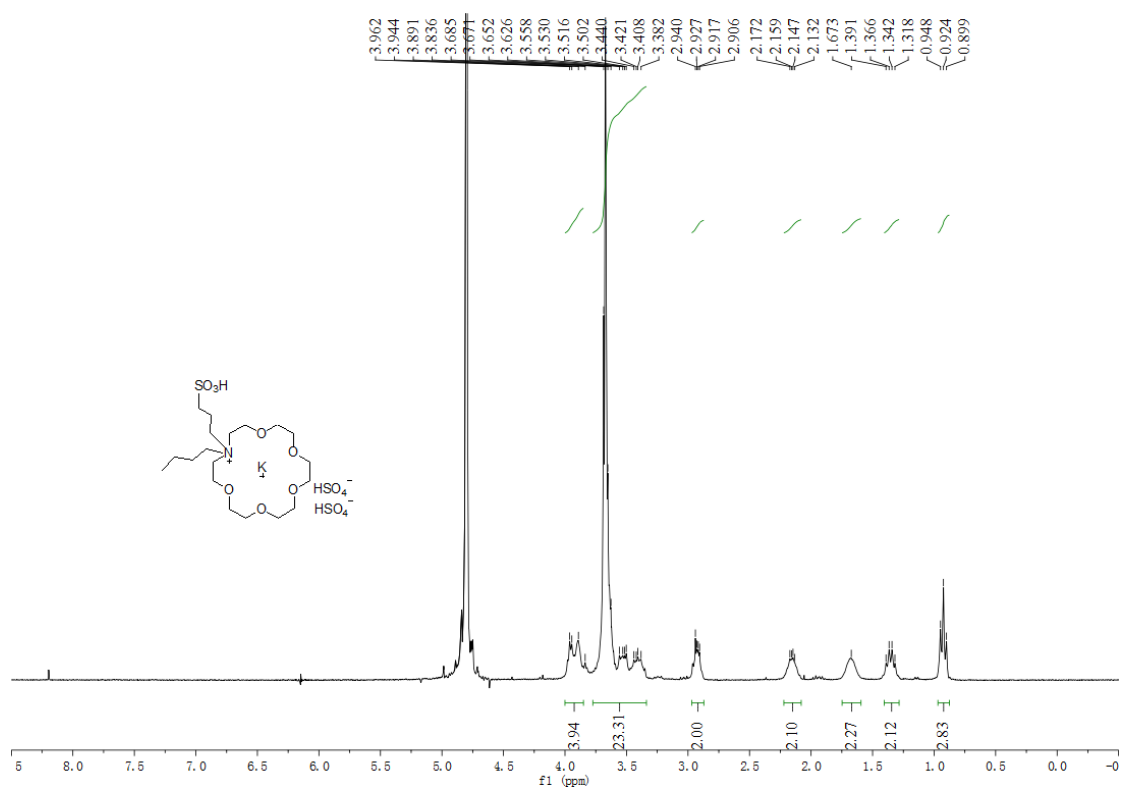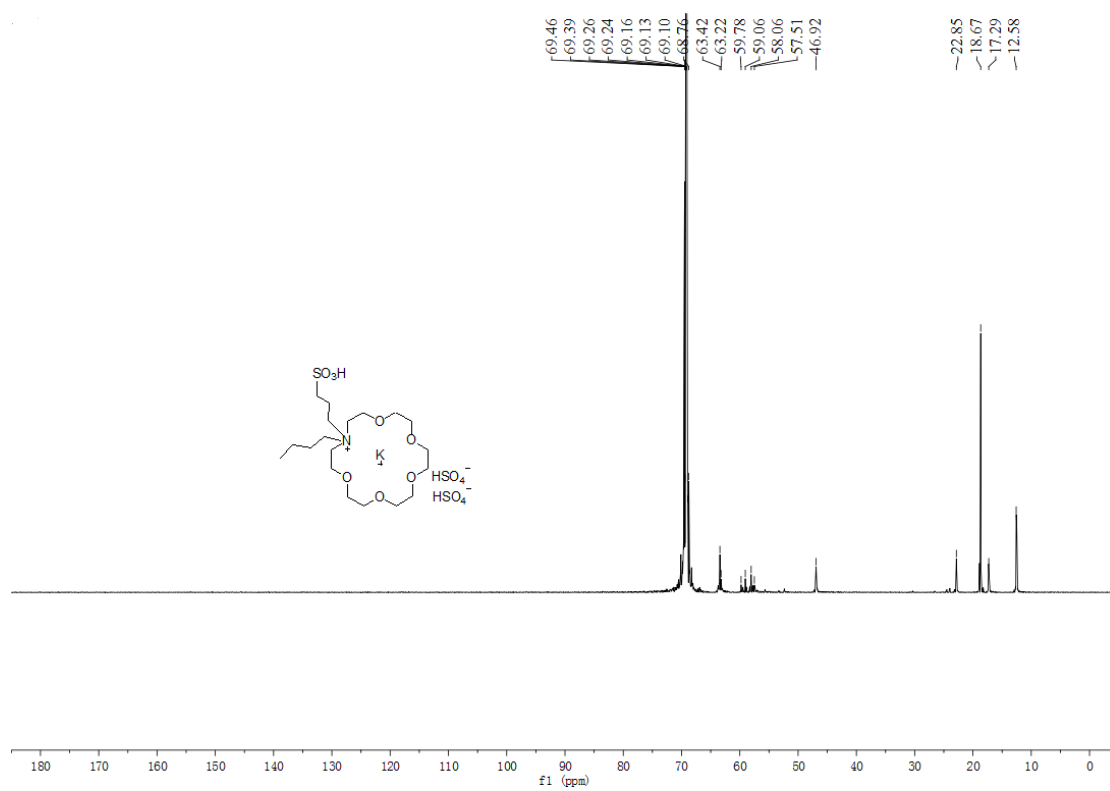

Chemical structure of compound 1 is shown in the top left. The structure is a macrocyclic crown ether with a potassium cation ( $K^+$ ) inside. The crown ether has a propyl chain and a sulfonic acid group ( $SO_3H$ ) attached to one of the oxygen atoms. The crown ether is also substituted with two trifluoroacetate groups ( $CF_3COO^-$ ).

$^1H$  NMR spectrum (DMSO- $d_6$ ) of compound 1. The x-axis represents the chemical shift in ppm, ranging from 0 to 10. The y-axis represents the intensity of the signal. The spectrum shows several peaks, with the following chemical shifts (ppm) and integration values:

| Chemical Shift (ppm) | Integration |
|----------------------|-------------|
| 3.943                | 4.00        |
| 3.926                | 4.00        |
| 3.874                | 4.00        |
| 3.818                | 4.00        |
| 3.667                | 4.00        |
| 3.653                | 4.00        |
| 3.634                | 4.00        |
| 3.541                | 4.00        |
| 3.512                | 4.00        |
| 3.498                | 4.00        |
| 3.485                | 4.00        |
| 3.422                | 4.00        |
| 3.404                | 4.00        |
| 3.391                | 4.00        |
| 3.364                | 4.00        |
| 2.941                | 24.29       |
| 2.922                | 24.29       |
| 2.907                | 24.29       |
| 2.899                | 24.29       |
| 2.889                | 24.29       |
| 2.154                | 2.25        |
| 2.139                | 2.25        |
| 2.129                | 2.25        |
| 1.656                | 2.22        |
| 1.372                | 2.35        |
| 1.347                | 2.35        |
| 1.323                | 2.29        |
| 1.299                | 2.29        |
| 0.930                | 3.09        |
| 0.906                | 3.09        |
| 0.881                | 3.09        |

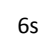

### IR Spectra of aCECIL-1

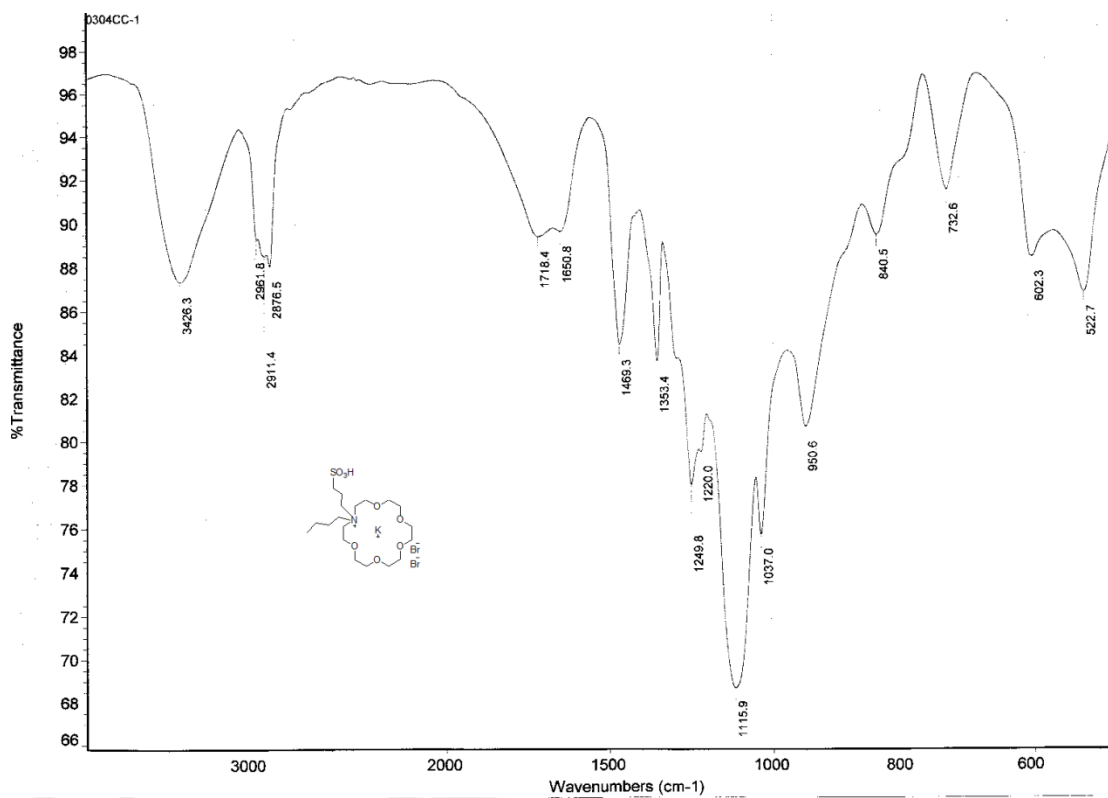

### IR Spectra of aCECIL-2

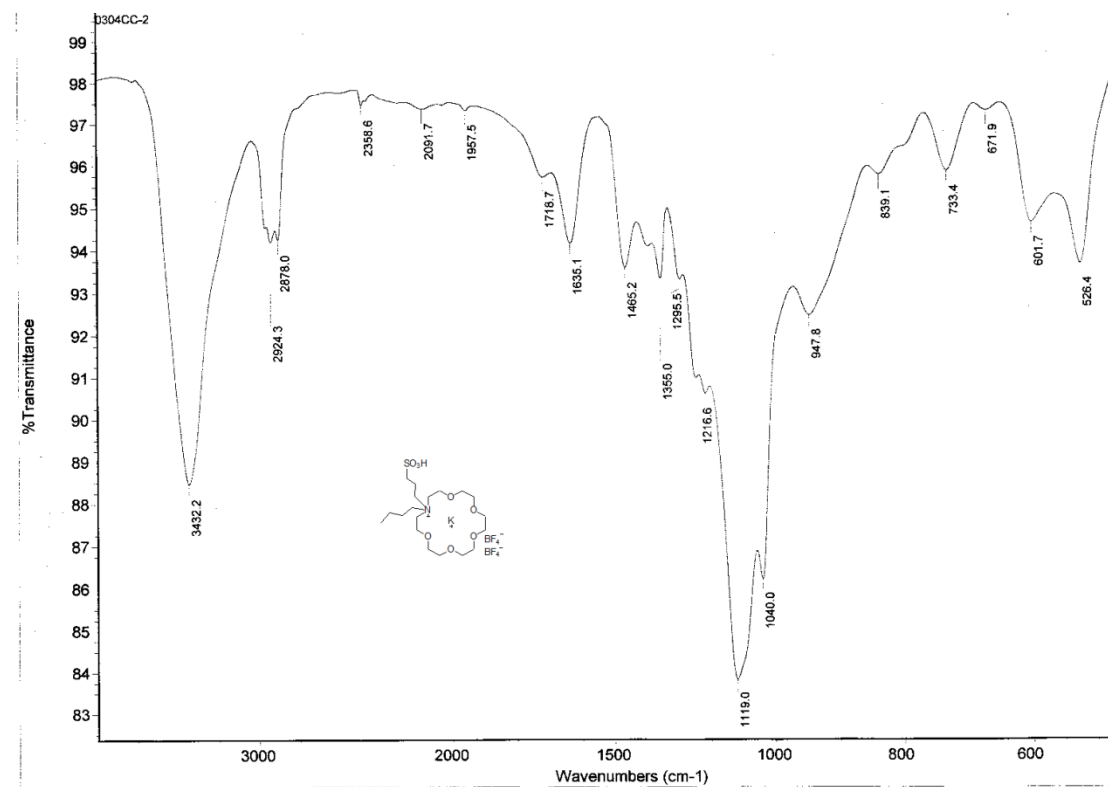

### IR Spectra of aCECIL-3

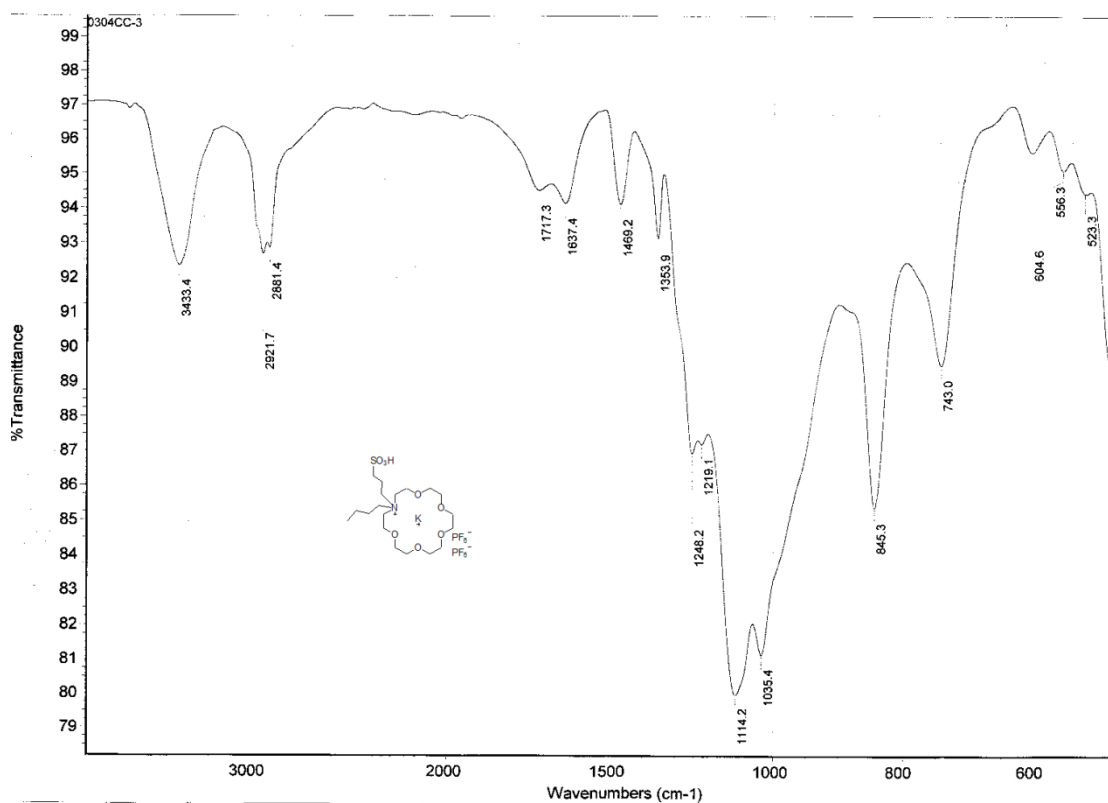

### IR Spectra of aCECIL-4

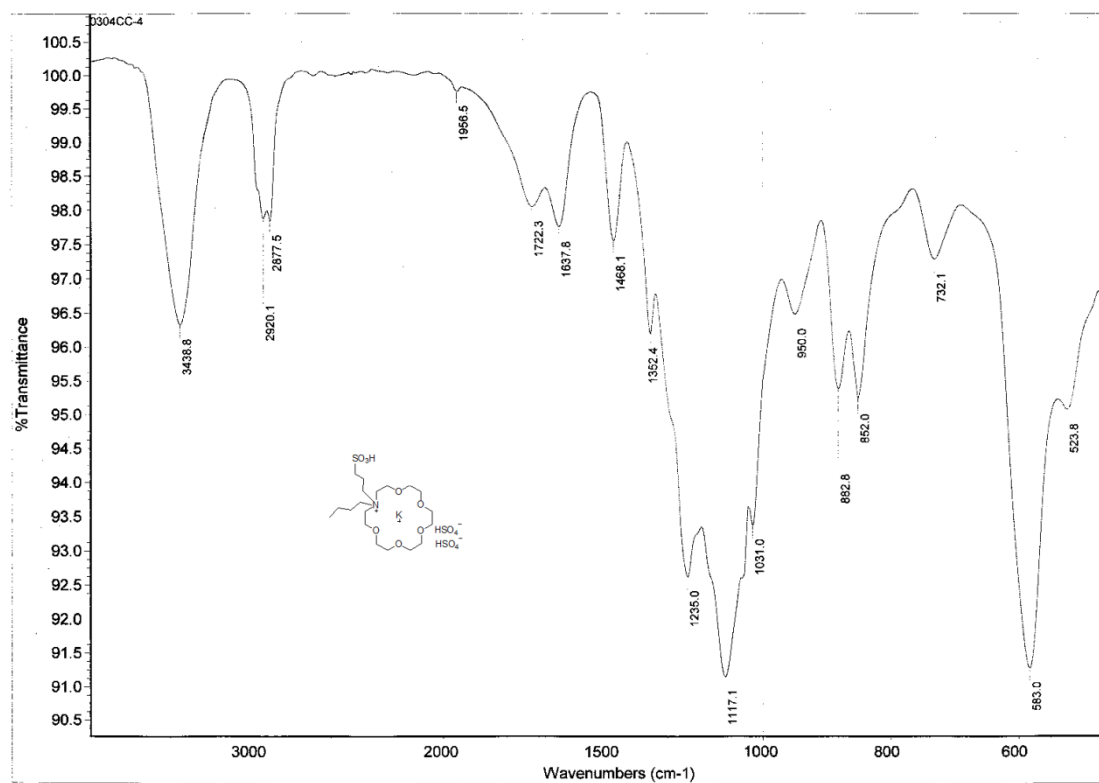



## IR Spectra of aCECIL-5

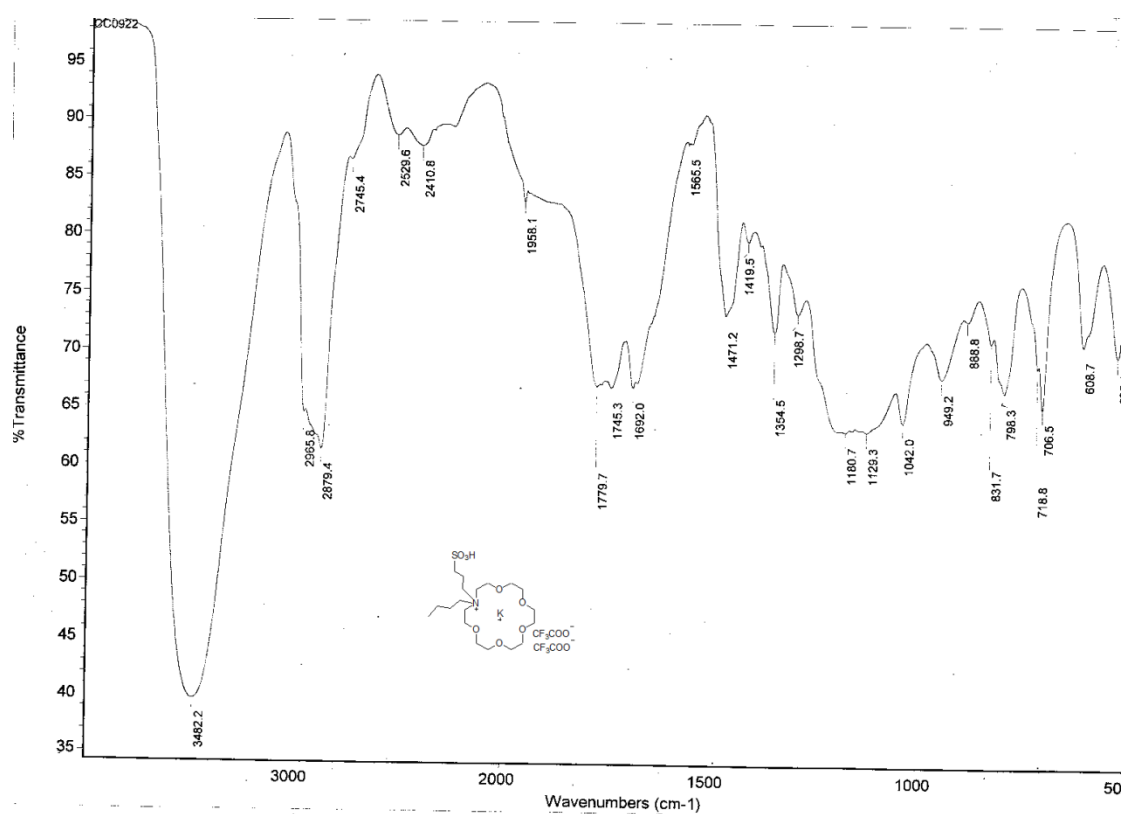

## TG of aCECIL-1~5

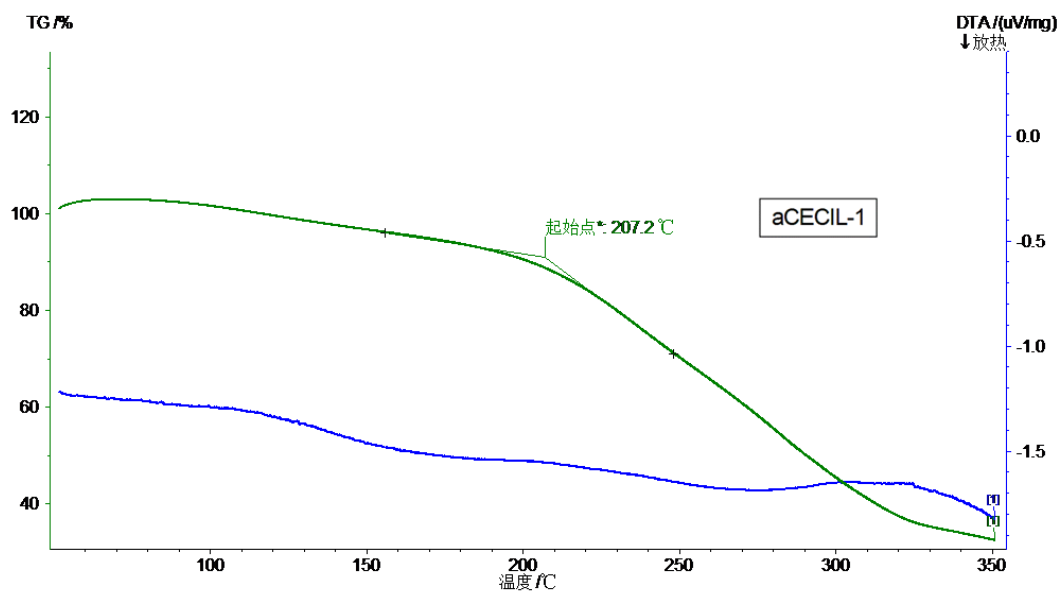

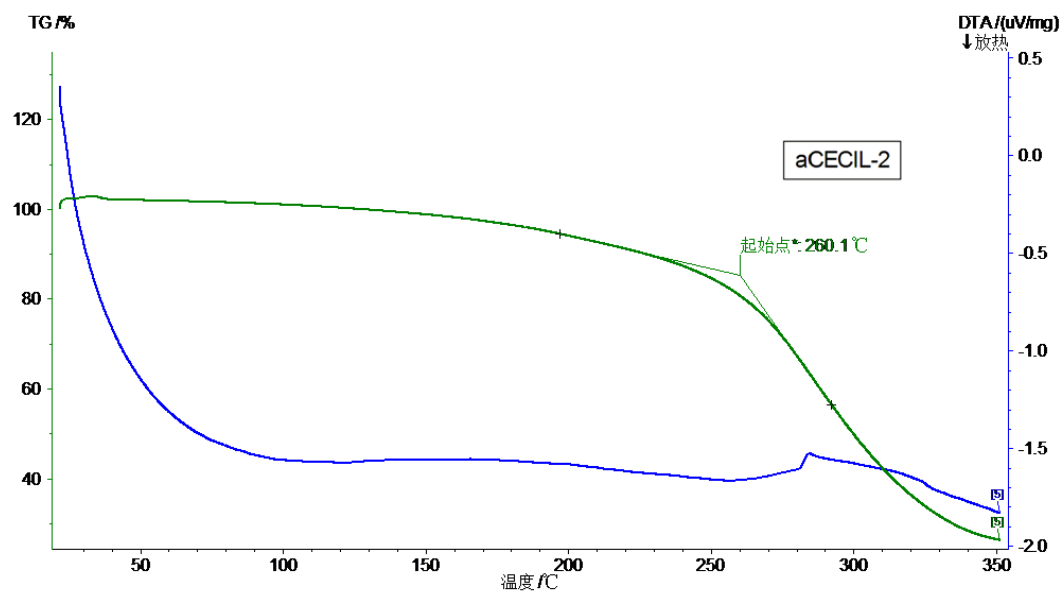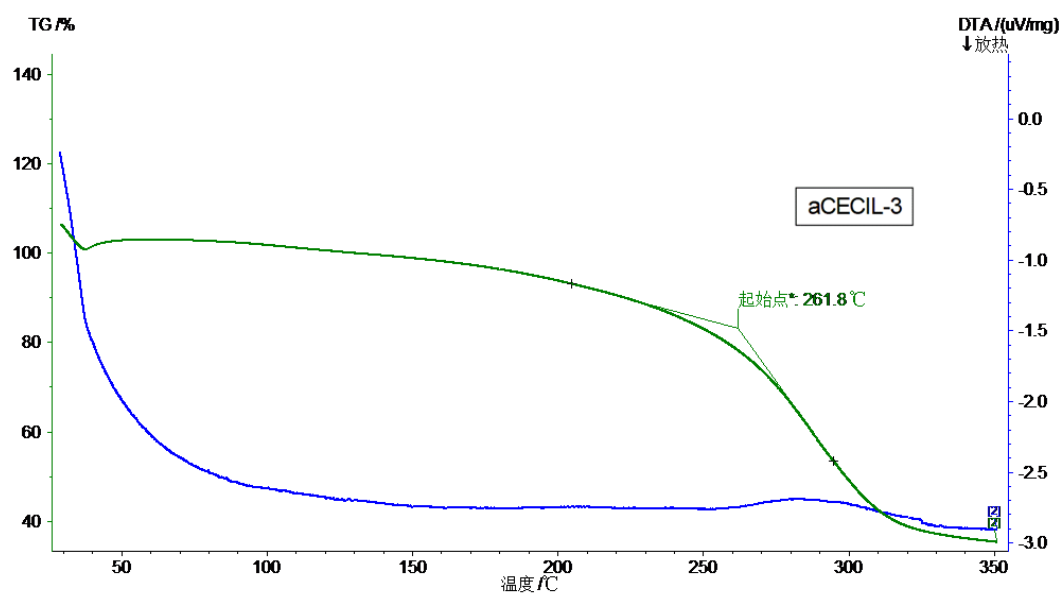

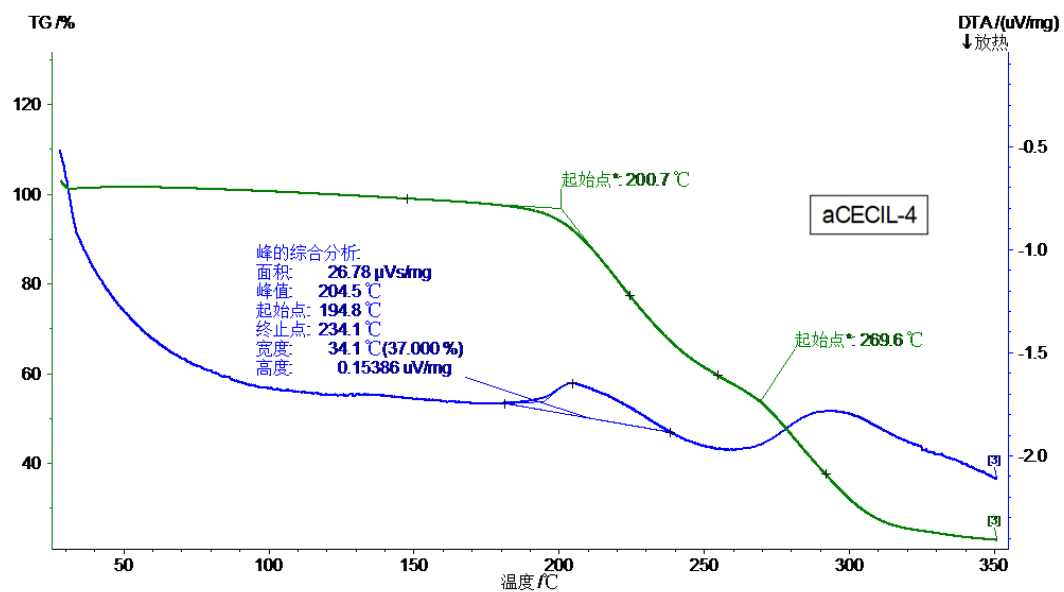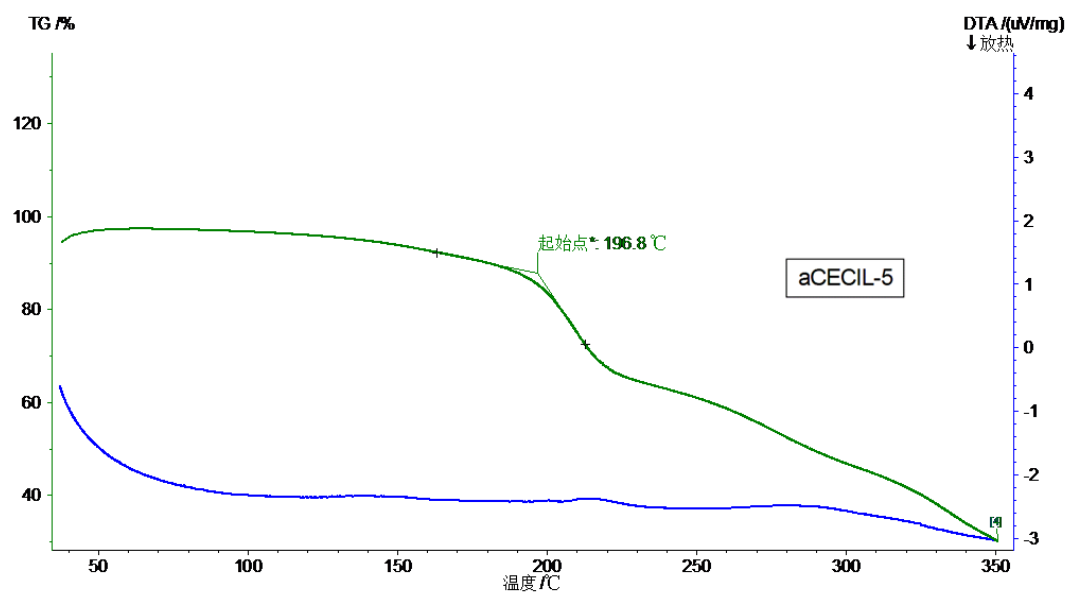

## Generic Display Report

### Analysis Info

Analysis Name D:\Data\YANGY\_MS\New\CHENGCHEN130522.d  
Method LOWmass.m  
Sample Name default  
Comment

Acquisition Date 5/22/2013 16:18:22

Operator ESQ6K  
Instrument esquire6000

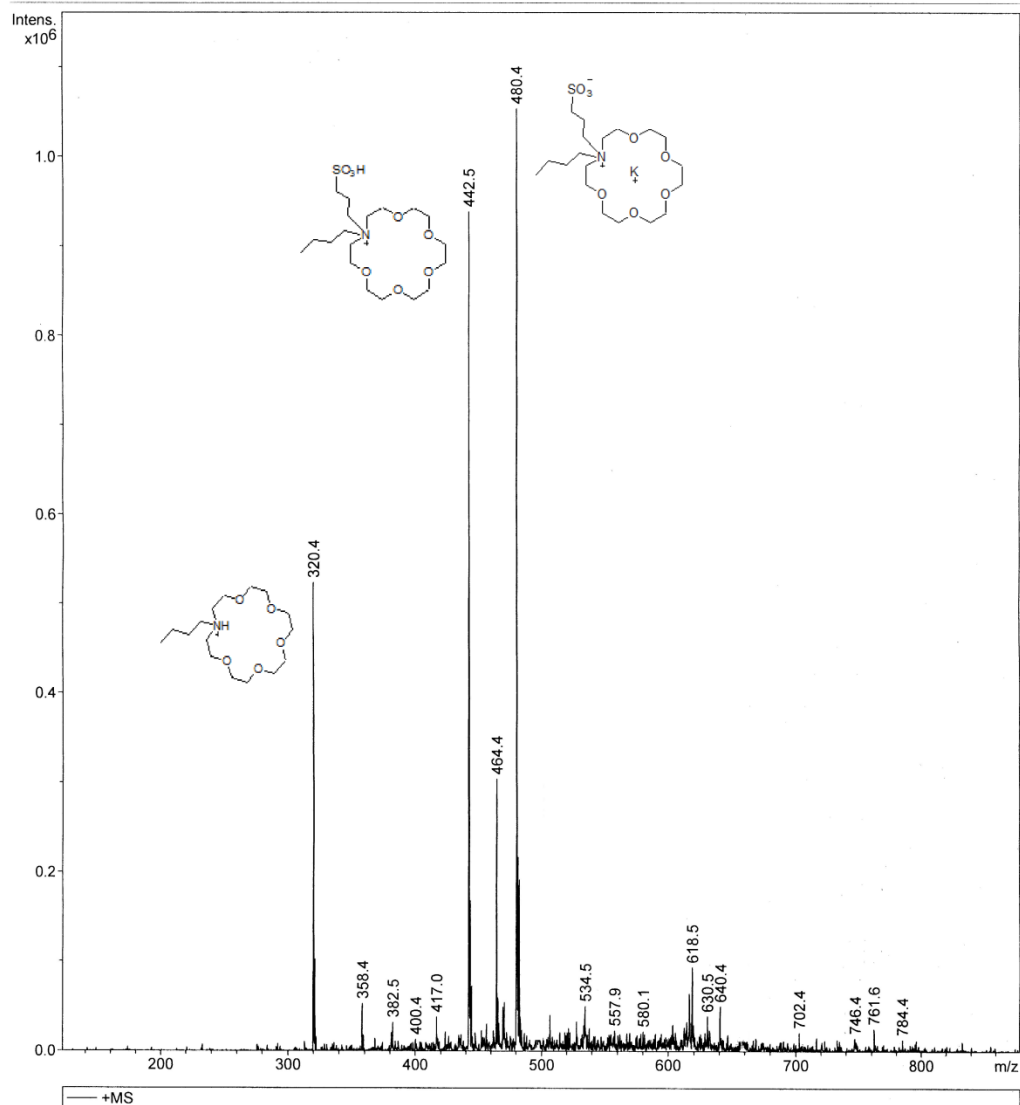

Supplement: c4ra03061c1.pdf [file c4ra03061c1.pdf]
